# Supplementary material for: Regional Characterization Study of Fatty Acids and Tocopherol in Organic Milk as a Tool for Potential Geographical Identification
Source: MDPI journal article supplement (doi:10.3390/foods9121743), 2020-11-26
Supplement: s1 [file s1]

[\[Supplementary Materials\]](#) including 1 Table and 1 Figure

# **Regional Characterization Study of Fatty Acids and Tocopherol in Organic Milk as a Tool for Potential Geographical Identification**

Ill-Min Chung, Yun-Ju Kim, Hee-Sung Moon, Chang Kwon, Hee-Youn Chi, and  
Seung-Hyun Kim\*

Department of Crop Science, College of Sanghuh Life Science, Konkuk University,  
Seoul 05029, Republic of Korea

**Ill-Min CHUNG**: [imcim@konkuk.ac.kr](mailto:imcim@konkuk.ac.kr),

**Yun-Ju KIM**: [bluebeing123@konkuk.ac.kr](mailto:bluebeing123@konkuk.ac.kr),

**Hee-Sung MOON**: [hsmoon7575@konkuk.ac.kr](mailto:hsmoon7575@konkuk.ac.kr),

**Chang KWON**: [chang794@konkuk.ac.kr](mailto:chang794@konkuk.ac.kr),

**Hee-Youn CHI**: [chi1143@konkujk.ac.kr](mailto:chi1143@konkujk.ac.kr),

**Seung-Hyun KIM**: [kshkim@konkuk.ac.kr](mailto:kshkim@konkuk.ac.kr)

\* To whom correspondence should be addressed:

Tel: +82-02-2049-6163; Fax: +82-02-455-1044; E-mail: [kshkim@konkuk.ac.kr](mailto:kshkim@konkuk.ac.kr)

**Running title:** Geographic identification of organic milk in Korea

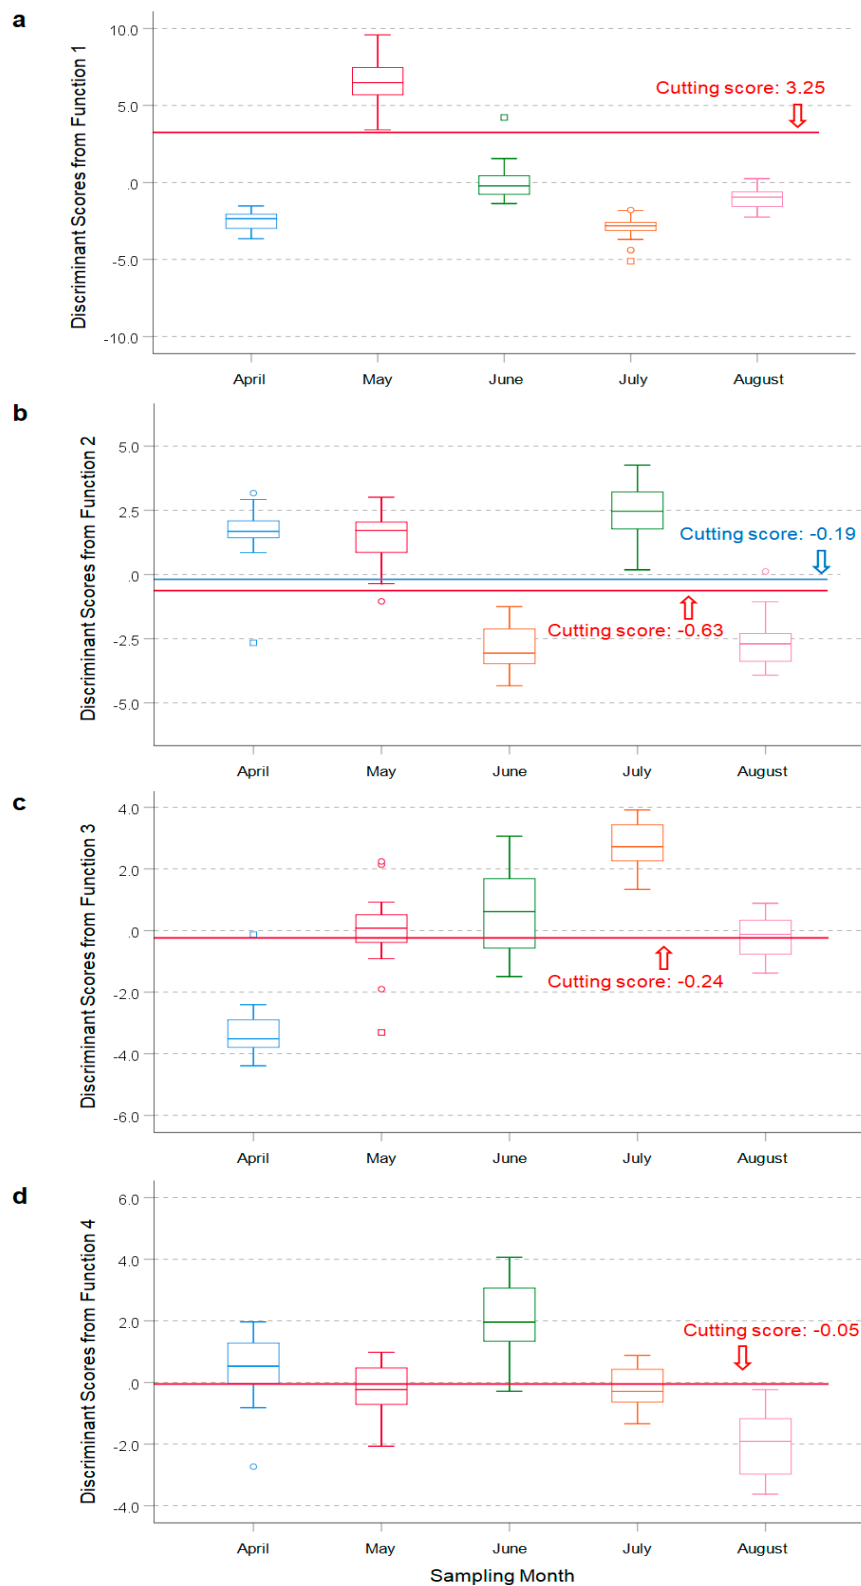

**Figure S1.** Box-and-whisker plots for discriminant scores from four canonical discriminant functions of the discriminative model (see Fig. 2b) developed for OM production month authenticity.

**Table S1.** Classification and cross-validated results<sup>a,b</sup> of OM production month by SDA.

|                              |       | Predicted Group Membership |     |      |      |        | Total |     |
|------------------------------|-------|----------------------------|-----|------|------|--------|-------|-----|
|                              |       | April                      | May | June | July | August |       |     |
| Original                     | Count | April                      | 19  | 0    | 0    | 0      | 1     | 20  |
|                              |       | May                        | 0   | 20   | 0    | 0      | 0     | 20  |
|                              |       | June                       | 0   | 0    | 19   | 0      | 1     | 20  |
|                              |       | July                       | 0   | 0    | 0    | 20     | 0     | 20  |
|                              |       | August                     | 0   | 0    | 0    | 0      | 20    | 20  |
|                              | %     | April                      | 95  | 0    | 0    | 0      | 5     | 100 |
|                              |       | May                        | 0   | 100  | 0    | 0      | 0     | 100 |
|                              |       | June                       | 0   | 0    | 95   | 0      | 5     | 100 |
|                              |       | July                       | 0   | 0    | 0    | 100    | 0     | 100 |
|                              |       | August                     | 0   | 0    | 0    | 0      | 100   | 100 |
| Cross-validated <sup>c</sup> | Count | April                      | 19  | 0    | 0    | 0      | 1     | 20  |
|                              |       | May                        | 0   | 20   | 0    | 0      | 0     | 20  |
|                              |       | June                       | 0   | 1    | 18   | 0      | 1     | 20  |
|                              |       | July                       | 0   | 0    | 0    | 20     | 0     | 20  |
|                              |       | August                     | 1   | 0    | 1    | 0      | 18    | 20  |
|                              | %     | April                      | 95  | 0    | 0    | 0      | 5     | 100 |
|                              |       | May                        | 0   | 100  | 0    | 0      | 0     | 100 |
|                              |       | June                       | 0   | 5    | 90   | 0      | 5     | 100 |
|                              |       | July                       | 0   | 0    | 0    | 100    | 0     | 100 |
|                              |       | August                     | 5   | 0    | 5    | 0      | 90    | 100 |

a. 98.0% of original grouped cases correctly classified.

b. 95.0% of cross-validated grouped cases correctly classified.

c. Cross validation is done only for those cases in the analysis. In cross validation, each case is classified by the functions derived from all cases other than that case.
