# Supplementary material for: Regional Characterization Study of Fatty Acids and Tocopherol in Organic Milk as a Tool for Potential Geographical Identification
Source: MDPI journal article supplement (doi:10.3390/foods9121743), 2020-11-26
Supplement: s1 [file s1]

Eigenvalues table

| Function | Eigenvalue          | % of variance | Cumulative % | Canonical correlation |
|----------|---------------------|---------------|--------------|-----------------------|
| 1        | 99.215 <sup>a</sup> | 73.5          | 73.5         | 0.995                 |
| 2        | 22.324 <sup>a</sup> | 16.5          | 90           | 0.978                 |
| 3        | 13.491 <sup>a</sup> | 10            | 100          | 0.965                 |

Wilks' Lamda

| Test of functions | Wilks' Lamda | Chi-square | df      | Sig.   |
|-------------------|--------------|------------|---------|--------|
| 1 to 3            | 0.0000       | 928.3030   | 48.0000 | 0.0000 |
| 2 to 3            | 0.0030       | 518.2520   | 30.0000 | 0.0000 |
| 3                 | 0.0690       | 237.9470   | 14.0000 | 0.0000 |

Structure matrix table

|                                                   | Function                 |                          |                          |
|---------------------------------------------------|--------------------------|--------------------------|--------------------------|
|                                                   | 1                        | 2                        | 3                        |
| <b><math>\alpha</math>-tocopherol<sup>a</sup></b> | <b>0.232<sup>*</sup></b> | -0.005                   | -0.203                   |
| C13:0                                             | <b>0.133<sup>*</sup></b> | -0.084                   | -0.079                   |
| <b>C20:3 n-3 all cis<sup>a</sup></b>              | <b>0.079<sup>*</sup></b> | 0.032                    | -0.039                   |
| C24:0                                             | -0.031                   | <b>0.449<sup>*</sup></b> | 0.297                    |
| C18:3 n-6 all cis                                 | 0.085                    | <b>0.166<sup>*</sup></b> | 0.135                    |
| <b>C15:1 n-5 cis<sup>a</sup></b>                  | -0.039                   | <b>-0.128</b>            | -0.03                    |
| <b>C22:2 n-6 all cis<sup>a</sup></b>              | 0.04                     | <b>-0.101</b>            | -0.046                   |
| C18:2 n-6 all cis                                 | 0.035                    | <b>0.083<sup>*</sup></b> | -0.068                   |
| <b>C20:3 n-6 all cis<sup>a</sup></b>              | 0.036                    | <b>0.076<sup>*</sup></b> | 0.038                    |
| <b>C14:1 n-5 cis<sup>a</sup></b>                  | -0.125                   | 0.104                    | <b>-0.446</b>            |
| C18:0                                             | 0.088                    | -0.016                   | <b>0.368<sup>*</sup></b> |
| <b>C16:1 n-7 cis<sup>a</sup></b>                  | -0.082                   | 0.038                    | <b>-0.361</b>            |
| C17:0                                             | 0.323                    | 0.032                    | <b>0.360<sup>*</sup></b> |
| C16:0                                             | -0.103                   | -0.102                   | <b>0.356<sup>*</sup></b> |
| <b>C18:3 n-3 all cis<sup>a</sup></b>              | 0.03                     | 0.183                    | <b>-0.314</b>            |
| <b>C18:1 n-9 cis+trans<sup>a</sup></b>            | -0.019                   | 0.007                    | <b>-0.29</b>             |
| <b>C22:1 n-9 cis<sup>a</sup></b>                  | 0.075                    | 0.107                    | <b>-0.26</b>             |
| <b>C20:2 n-6 all cis<sup>a</sup></b>              | 0.015                    | 0.093                    | <b>0.174<sup>*</sup></b> |
| <b>C22:6 n-3 all cis<sup>a</sup></b>              | 0.099                    | 0.12                     | <b>-0.162</b>            |
| C12:0                                             | -0.046                   | -0.017                   | <b>-0.15</b>             |
| <b>C22:0<sup>a</sup></b>                          | 0.095                    | 0.104                    | <b>-0.146</b>            |
| <b>C17:1 n-7 cis<sup>a</sup></b>                  | -0.009                   | -0.062                   | <b>-0.141</b>            |
| C20:5 n-3 all cis                                 | 0.028                    | 0.087                    | <b>-0.136</b>            |
| C20:0                                             | 0.114                    | 0.069                    | <b>-0.126</b>            |
| C20:1 n-9 cis                                     | 0.055                    | 0.09                     | <b>-0.119</b>            |
| C10:0                                             | 0.011                    | 0.002                    | <b>-0.117</b>            |
| C14:0                                             | -0.006                   | 0.019                    | <b>-0.092</b>            |
| C8:0                                              | -0.009                   | 0.012                    | <b>-0.086</b>            |
| <b>C20:4 n-6 all cis<sup>a</sup></b>              | -0.049                   | -0.01                    | <b>0.052<sup>*</sup></b> |

|                          |        |        |                          |
|--------------------------|--------|--------|--------------------------|
| <b>C23:0<sup>a</sup></b> | -0.041 | 0.007  | <b>-0.045</b>            |
| C11:0                    | 0.029  | -0.009 | <b>-0.044</b>            |
| <b>C6:0<sup>a</sup></b>  | -0.014 | 0.025  | <b>0.042<sup>*</sup></b> |
| C6:0                     | -0.004 | 0.01   | <b>-0.018</b>            |

\*Pooled within-groups correlations between discriminating variables and standardized canonical discriminant functions

a Variables ordered by absolute size of correlation within function.

**Functions at group centroids table**

| Region     | Function |        |        |
|------------|----------|--------|--------|
|            | 1        | 2      | 3      |
| Hoengseong | 4.535    | -6.34  | -3.43  |
| Boryeong   | 4.202    | 6.741  | -2.999 |
| Gochang    | 7.973    | -0.254 | 5.493  |
| Jeju       | -16.709  | -0.147 | 0.936  |

Unstandardized canonical discriminant functions evaluated at group means.

**Box's M test results table**

|         |         |               |
|---------|---------|---------------|
| Box's M |         | 2390.388      |
| F       | Approx. | 4.064         |
|         | df1     | 408           |
|         | df2     | 19463.815     |
|         | sig,    | <b>0.0000</b> |

Tests null hypothesis of equal population covariance matrices.

**Canonical Discriminant Function Coefficients table**

|                          | Canonical discriminant function coefficients |        |        |
|--------------------------|----------------------------------------------|--------|--------|
|                          | 1                                            | 2      | 3      |
| C6:0                     | 2.141                                        | -1.329 | 0.502  |
| C8:0                     | -4.989                                       | 12.761 | -1.432 |
| C10:0                    | 3.583                                        | -4.697 | 0.759  |
| C11:0                    | -6.135                                       | 2.802  | 3.273  |
| C12:0                    | -1.837                                       | -1.875 | 0.751  |
| C13:0                    | 5.064                                        | -0.426 | 21.433 |
| C14:0                    | -0.511                                       | 1.104  | -0.816 |
| C16:0                    | -0.04                                        | -0.092 | 0.234  |
| C17:0                    | 6.303                                        | 0.162  | -1.777 |
| C18:0                    | -0.183                                       | -0.207 | 0.236  |
| C18:2 n-6 <i>all cis</i> | -0.419                                       | 0.222  | -0.229 |
| C18:3 n-6 <i>all cis</i> | -6.725                                       | 7.464  | 7.053  |
| C20:0                    | 5.12                                         | 3.864  | -1.482 |
| C20:1 n-9 <i>cis</i>     | 2.333                                        | -0.001 | 0.05   |
| C20:5 n-3 <i>all cis</i> | 8.166                                        | -1.416 | 4.406  |
| C24:0                    | -1.843                                       | 5.53   | 3.647  |

|      |        |         |         |
|------|--------|---------|---------|
| (상수) | 14.583 | -39.447 | -56.085 |
|------|--------|---------|---------|

Unstandardized coefficients.

### Standardized Canonical Discriminant Function

|                   | Function      |               |        |
|-------------------|---------------|---------------|--------|
|                   | 1             | 2             | 3      |
| <b>C6:0</b>       | <b>3.093</b>  | -1.92         | 0.726  |
| <b>C8:0</b>       | <b>-4.243</b> | <b>10.852</b> | -1.218 |
| <b>C10:0</b>      | <b>7.187</b>  | <b>-9.421</b> | 1.521  |
| C11:0             | -0.796        | 0.364         | 0.425  |
| <b>C12:0</b>      | <b>-4.121</b> | <b>-4.206</b> | 1.685  |
| C13:0             | 0.348         | -0.029        | 1.475  |
| <b>C14:0</b>      | <b>-2.068</b> | <b>4.469</b>  | -3.306 |
| C16:0             | -0.203        | -0.465        | 1.177  |
| C17:0             | 1.993         | 0.051         | -0.562 |
| C18:0             | -1.365        | -1.541        | 1.756  |
| C18:2 n-6 cis     | -0.896        | 0.476         | -0.49  |
| C18:3 n-6 all cis | -0.371        | 0.412         | 0.389  |
| C20:0             | 0.928         | 0.7           | -0.269 |
| C20:1             | 1.007         | -0.001        | 0.022  |
| C20:5 n-3 all cis | 0.605         | -0.105        | 0.326  |
| C24:0             | -0.397        | 1.191         | 0.786  |
